# Supplementary material for: Mycotoxin Occurrence and Risk Assessment in Gluten-Free Pasta through UHPLC-Q-Exactive Orbitrap MS
Source: MDPI journal article supplement (doi:10.3390/toxins13050305), 2021-04-25
Supplement: s1 [file s1]

# **Supplementary Materials: Mycotoxin Occurrence and Risk Assessment in Gluten-free Pasta through UHPLC-Q-Exactive Orbitrap MS**

Josefa Tolosa, Yelko Rodríguez-Carrasco, Giulia Graziani, Anna Gaspari, Emilia Ferrer, Jordi Mañes and Alberto Ritieni

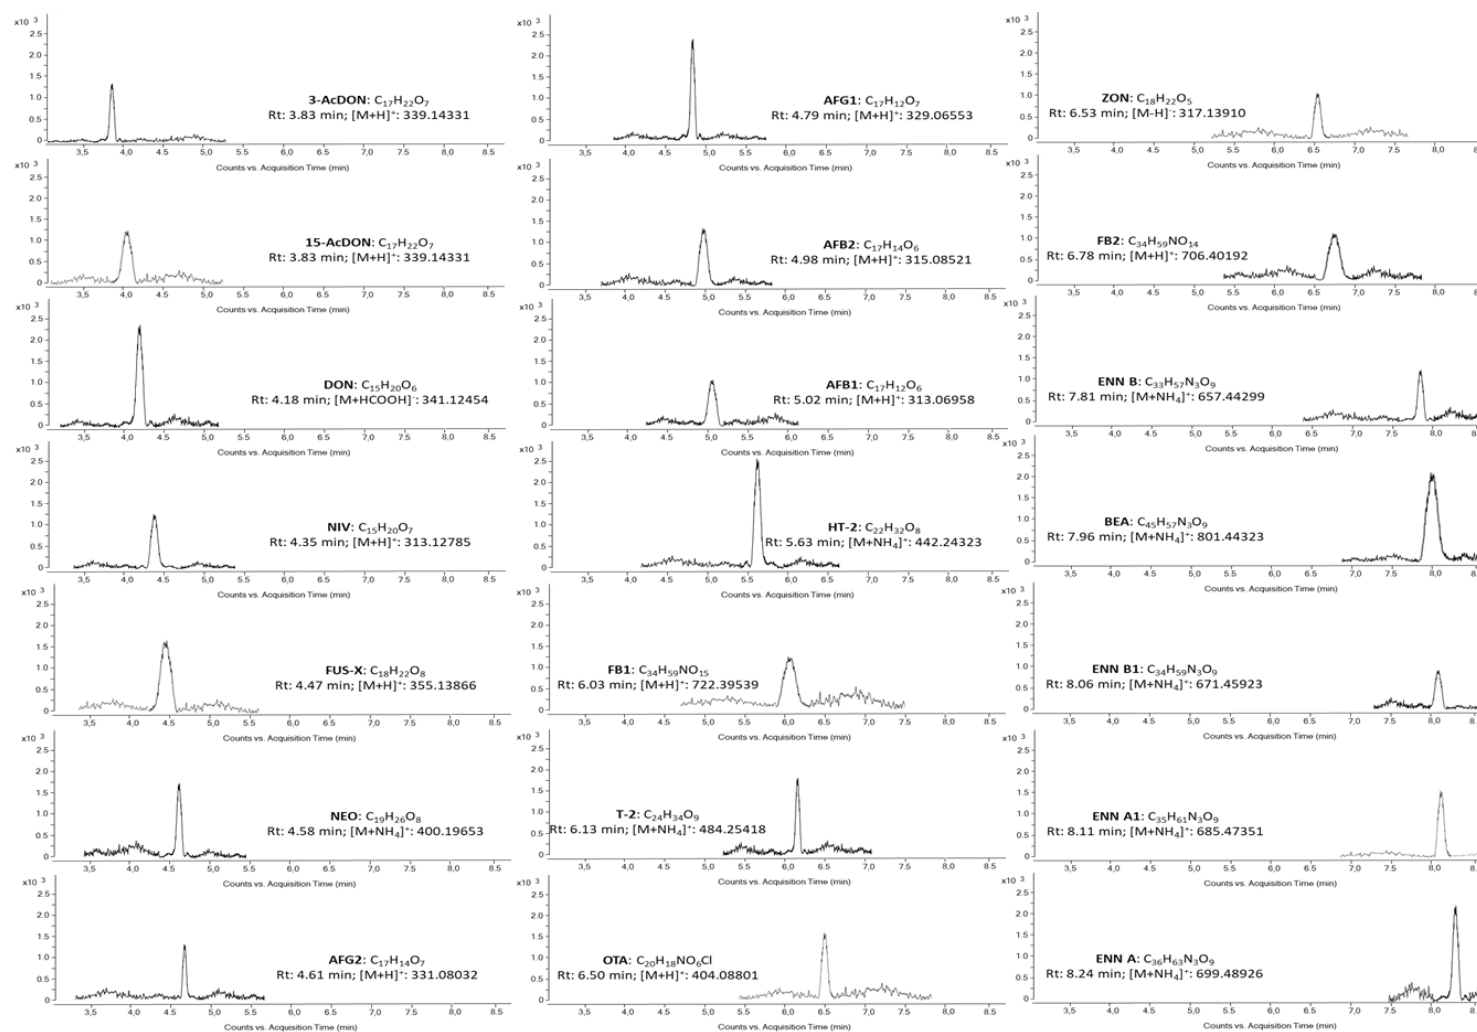

Figure S1. UPLC-Q-Orbitrap HRMS extracted ion chromatogram of a blank GF sample spiked at 12.5 µg/kg of each mycotoxin.
